# Supplementary material for: Highly Selective Separation of C2H2/CO2 and C2H2/C2H4 in an N-Rich Cage-Based Microporous Metal-Organic Framework
Source: Hindawi journal article supplement (doi:10.1155/2023/4740672), 2023-01-01
Supplement: f1 [file 4740672.f1.pdf]

## Supplementary Information

### Highly selective separation of C<sub>2</sub>H<sub>2</sub>/CO<sub>2</sub> and C<sub>2</sub>H<sub>2</sub>/C<sub>2</sub>H<sub>4</sub> in an N-rich cage-based microporous metal-organic framework

Lingzhi Yang<sup>1,2</sup>, Wenpeng Xie<sup>3</sup>, Qiuju Fu<sup>3</sup>, Liting Yan<sup>1</sup>, Shuo Zhang<sup>1, 3</sup>, Huimin Jiang<sup>1, 3</sup>, Liangjun Li<sup>3</sup>, Xin Gu<sup>3</sup>, Dandan Liu<sup>3</sup>, Pengcheng Dai<sup>3</sup>, Qingbin Zheng<sup>2</sup>, Xuebo Zhao<sup>1</sup>

<sup>1</sup>School of Materials Science and Engineering, Qilu University of Technology (Shandong Academy of Sciences), Jinan 250353, China

<sup>2</sup>School of Science and Engineering, The Chinese University of Hong Kong, Shenzhen 518172, China

<sup>3</sup>Institute of New Energy, College of New Energy, State Key Laboratory of Heavy Oil Processing, China University of Petroleum (East China), Qingdao 266580, China

Correspondence should be addressed to Xuebo Zhao: zhaoxuebo@upc.edu.cn and Qingbin Zheng: zhengqingbin@cuhk.edu.cn

**Figure S1 to S13:**

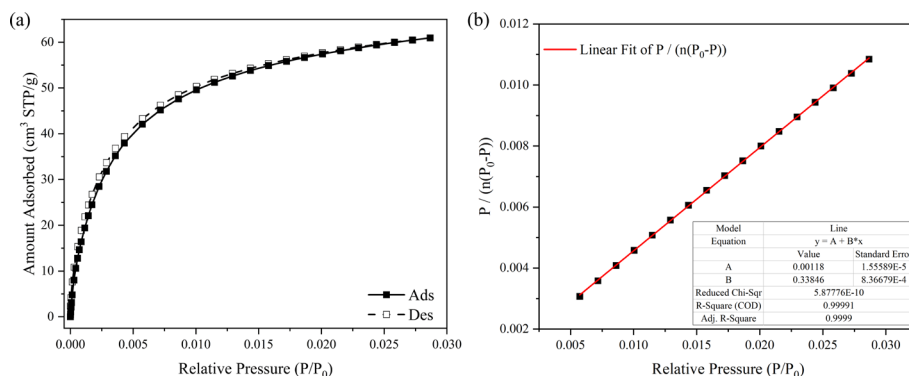

**Figure S1.** (a) CO<sub>2</sub> sorption isotherms for Cd-TZ at 273 K. (b) BET plot for CO<sub>2</sub> adsorption on Cd-TZ at 273 K.

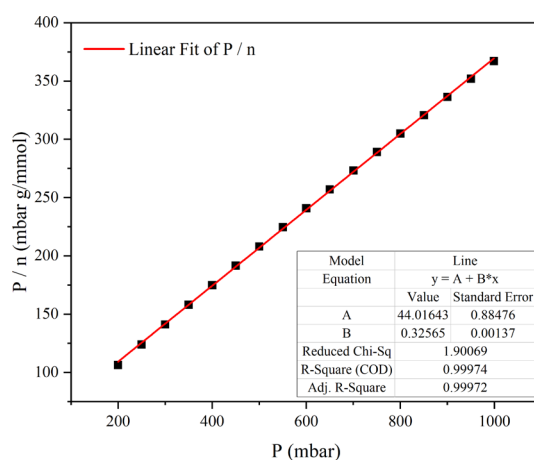

**Figure S2.** Langmuir plot for CO<sub>2</sub> adsorption on Cd-TZ at 273 K.

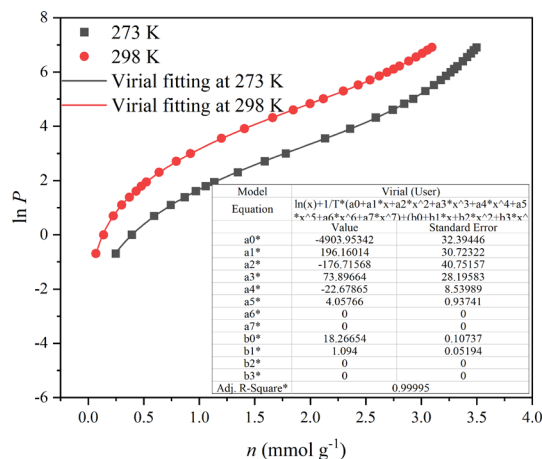

**Figure S3.** C<sub>2</sub>H<sub>2</sub> isotherms for Cd-TZ global fitting using Virial method.

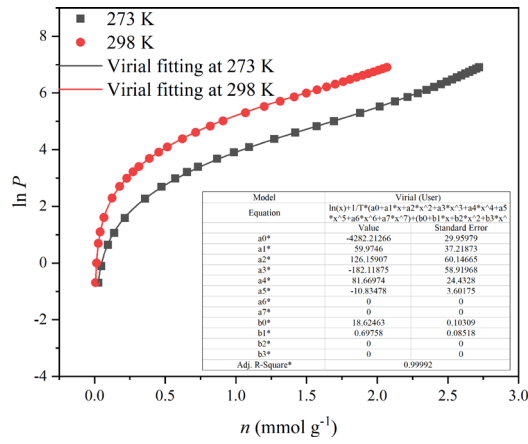

**Figure S4.** CO<sub>2</sub> isotherms for Cd-TZ global fitting using Virial method.

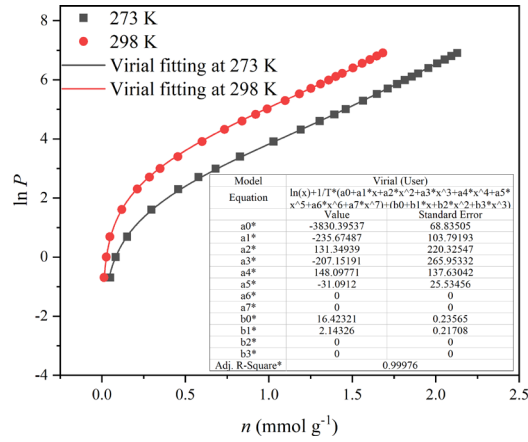

**Figure S5.** C<sub>2</sub>H<sub>4</sub> isotherms for Cd-TZ global fitting using Virial method.

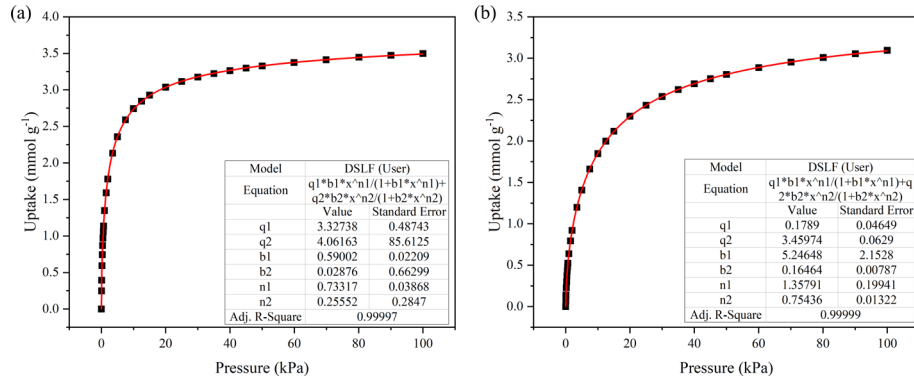

**Figure S6.** DSLF fitting of the C<sub>2</sub>H<sub>2</sub> sorption data at 273 K (a) and 298 K (b) for Cd-TZ.

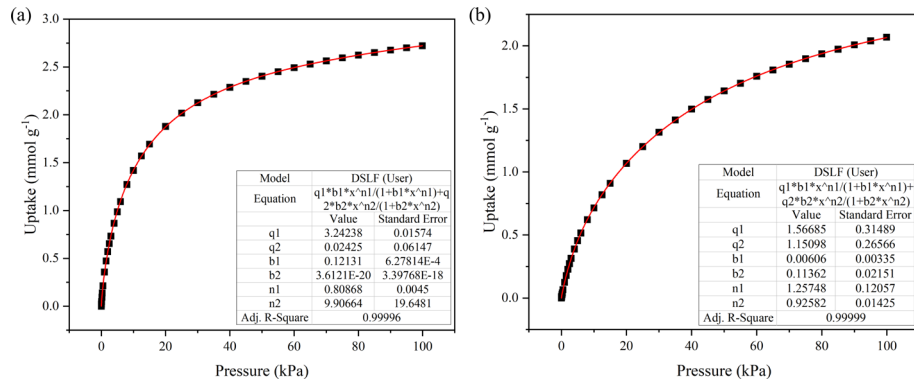

**Figure S7.** DSLF fitting of the CO<sub>2</sub> sorption data at 273 K (a) and 298 K (b) for Cd-TZ.

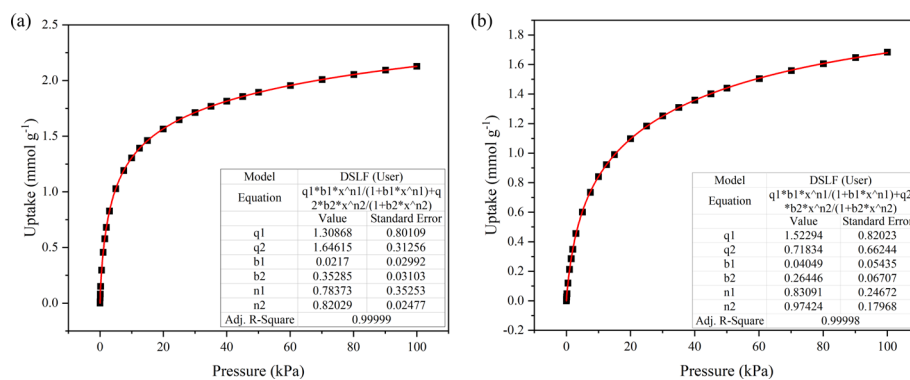

**Figure S8.** DSLE fitting of the C<sub>2</sub>H<sub>4</sub> sorption data at 273 K (a) and 298 K (b) for Cd-TZ.

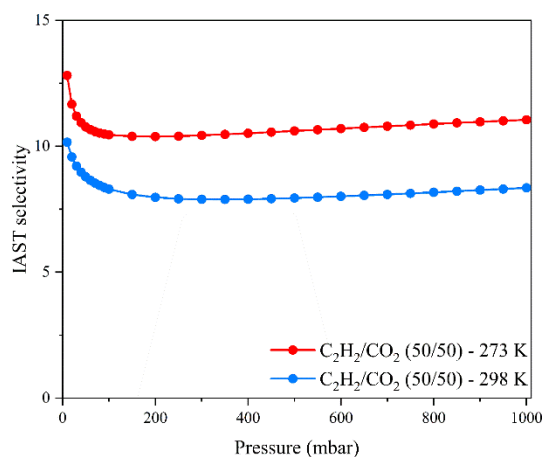

**Figure S9.** IAST selectivities for C<sub>2</sub>H<sub>2</sub>/CO<sub>2</sub> with compositions of 50/50 at 298 K and 273 K.

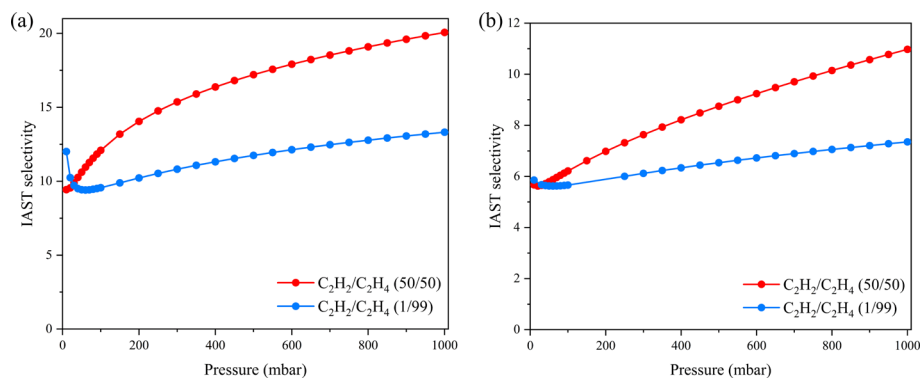

**Figure S10.** IAST selectivities for C<sub>2</sub>H<sub>2</sub>/C<sub>2</sub>H<sub>4</sub> with compositions of 50/50 and 1/99 at (a) 273 K and (b) 298 K

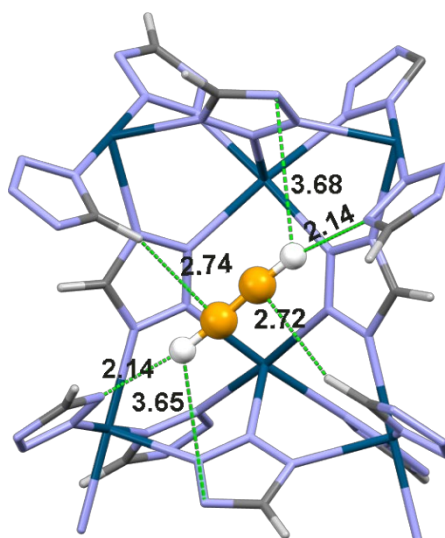

**Figure S11.** The interaction between Cd-TZ and  $C_2H_2$  in the preferential adsorption sites. Cd, C, N and H in Cd-TZ are represented by dark blue, bright grey, lavender and white, respectively; C and H in  $C_2H_2$  is represented by bright yellow and white, respectively. The labeled distance is measured in Å.

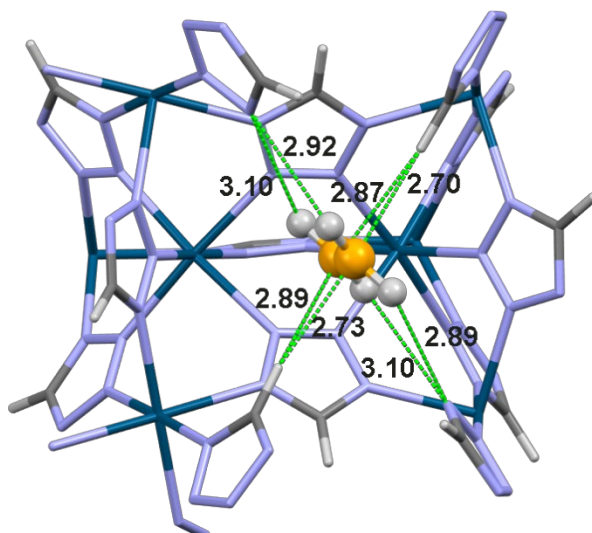

**Figure S12.** The interaction between Cd-TZ and  $C_2H_4$  in the preferential adsorption sites. Cd, C, N and H in Cd-TZ are represented by dark blue, bright grey, lavender and white, respectively; C and H in  $C_2H_4$  is represented by bright yellow and white, respectively. The labeled distance is measured in Å.

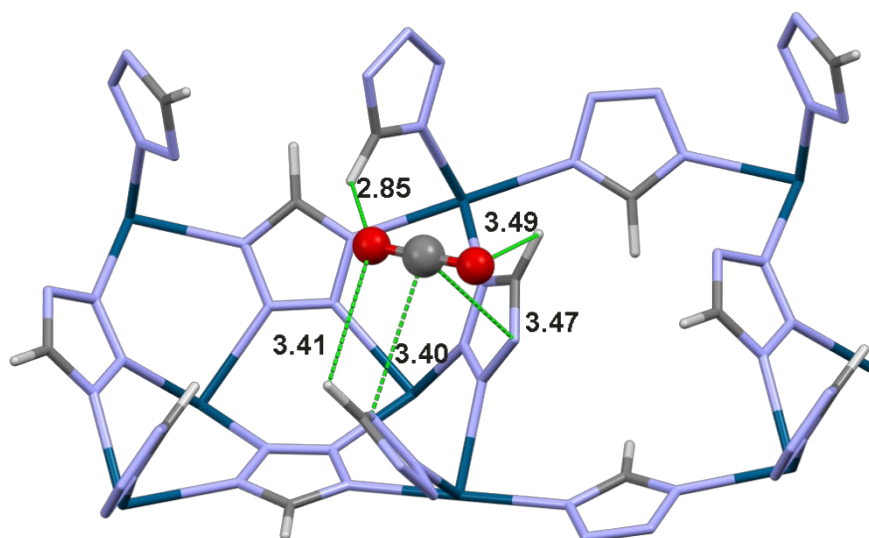

**Figure S13.** The interaction between Cd-TZ and CO<sub>2</sub> in the preferential adsorption sites. Cd, C, N, O, H in Cd-TZ and CO<sub>2</sub> are represented by dark blue, bright grey, lavender, red and white, respectively. The labeled distance is measured in Å.
